# Supplementary material for: ETV4 collaborates with Wnt/β-catenin signaling to alter cell cycle activity and promote tumor aggressiveness in gastrointestinal stromal tumor
Source: PubMed Central journal article supplement (PMC5768396; doi:10.18632/oncotarget.23173), 2017-12-11
Supplement: oncotarget-08-114195-s001.pdf [file oncotarget-08-114195-s001.pdf]

## ETV4 collaborates with Wnt/ $\beta$ -catenin signaling to alter cell cycle activity and promote tumor aggressiveness in gastrointestinal stromal tumor

### SUPPLEMENTARY MATERIALS

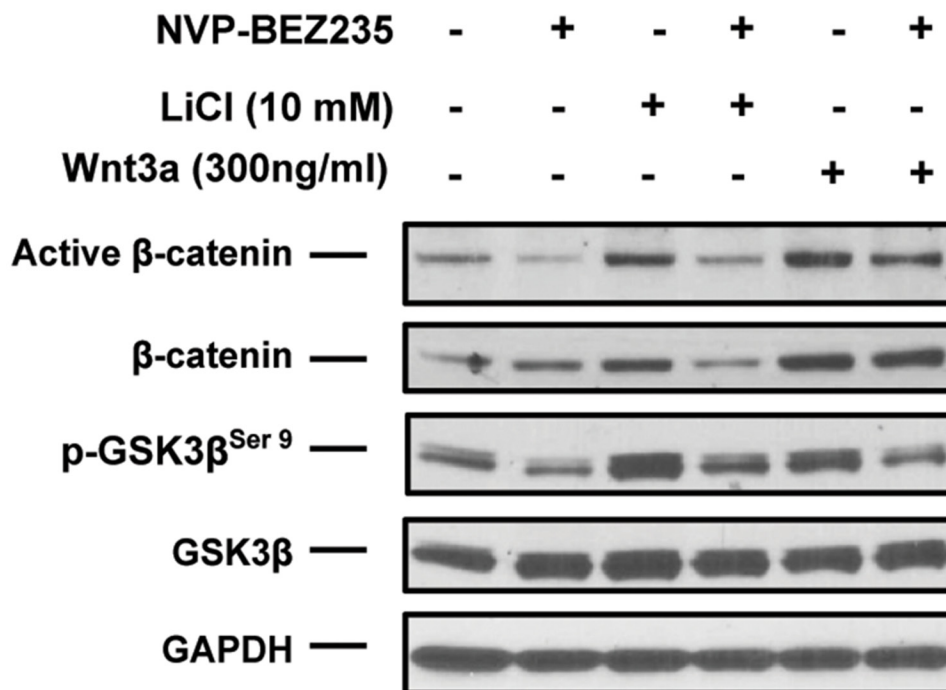

**Supplementary Figure 1: Cross talk between PI3K/Akt and GSK3 $\beta$  contribute to  $\beta$ -catenin stability.** GIST882 cells were pretreated with 500 nM NVP-BEZ235, a dual PI3K/Akt inhibitor for 2h, and then treated with 10 mM LiCl for 14h or 300 ng/ml rhWnt3a for 4h. Cell lysates were analyzed by Western blot with indicated antibodies.

Supplementary Table 1: Clinicopathologic characteristics of 55 specimens from 55 patients

|                             | Primary/untreated | Metastatic/resistant |
|-----------------------------|-------------------|----------------------|
| Number of patients          | 32                | 23                   |
| Number of specimens         | 32                | 23                   |
| Median age (years)          | 41 (38-85)        | 56 (39-73)           |
| Female                      | 11                | 6                    |
| Male                        | 21                | 17                   |
| Primary                     | 32                | 0                    |
| Metastatic                  | 0                 | 22                   |
| Local recurrence            | 0                 | 1                    |
| Primary Location            |                   |                      |
| Stomach                     | 29                | 5                    |
| Small intestine             | 1                 | 7                    |
| Other                       | 2                 | 11                   |
| Tyrosine kinase inhibitor   |                   |                      |
| Imatinib                    | Not applicable    | 23                   |
| Sunitinib                   |                   | 6                    |
| Other                       |                   | 4                    |
| Treatment duration (months) | Not applicable    | 36-132               |
| Mutational status           |                   |                      |
| <i>KIT</i> exon 9           | 0                 | 3 <sup>a</sup>       |
| <i>KIT</i> exon 11          | 9                 | 18 <sup>b</sup>      |
| <i>KIT</i> exon 13          | 0                 | 7                    |
| <i>PDGFRA</i>               | 4                 | 1                    |
| WT                          | 1                 | 1                    |
| Unavailable                 | 18                | 0                    |

<sup>a</sup>3 patients also had a secondary *KIT* exon 13 mutation.

<sup>b</sup>4 patients also had a secondary *KIT* exon 13 mutation, and 3 had a secondary exon 17 mutation.

Supplementary Table 2: Differentially regulated pathways in control siRNA vs. ETV4 siRNA knockdown

| Rank | Pathway name                        | Input genes in pathway | Pathway genes on chip | Input gene name                     | P-value  |
|------|-------------------------------------|------------------------|-----------------------|-------------------------------------|----------|
| 1    | Antigen processing and presentation | 1                      | 79                    |                                     | 1.80E-03 |
| 2    | DNA replication                     | 3                      | 33                    |                                     | 2.96E-02 |
| 3    | Parkinson's disease                 | 3                      | 104                   |                                     | 3.20E-02 |
| 4    | Cell cycle                          | 5                      | 105                   | CDKN1C, SMC1A, CDC23, GADD45A, ORC4 | 3.21E-02 |
| 5    | Wnt signaling pathway               | 3                      | 134                   | SFRP4, TBL1X, PPP2R1B               | 3.97E-02 |
| 6    | Nucleotide excision repair          | 3                      | 42                    |                                     | 4.77E-02 |
